# Supplementary material
Source: PubMed Central journal article supplement (PMC4144709)
Supplement: bi500632a_si_001.pdf [file bi500632a_si_001.pdf]

## SUPPLEMENTAL DATA

Extracellular administration of anandamide had no effect on  $[Ca^{2+}]_i$  of  $CB_2$ -U2OS cells; 0.01, 0.1 and 1  $\mu$ M anandamide administered by bath application modified  $[Ca^{2+}]_i$  by  $9 \pm 4.7$  nM,  $n = 29$  cells;  $6 \pm 5.5$  nM,  $n = 41$  and  $8 \pm 4.9$  nM,  $n = 37$  respectively; in the presence of 1  $\mu$ M AM630, the effect measured  $6 \pm 3.9$  nM,  $n = 32$  cells (Supp. Fig. 1)

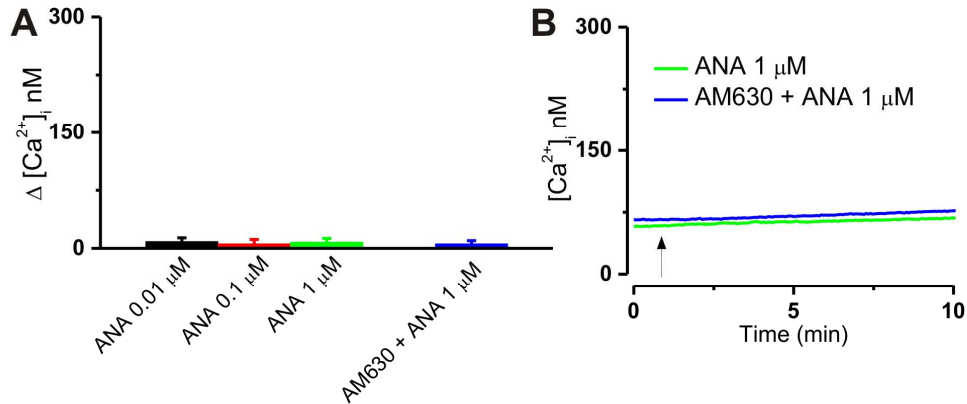

**Supplemental Figure 1.  $CB_2$ -transfected U2OS cells do not increase  $[Ca^{2+}]_i$  in response to extracellular application of anandamide.** **A**, Comparison of the amplitudes of the  $Ca^{2+}$  responses produced by extracellular administration of anandamide (ANA, 0.01-1  $\mu$ M) or of 1  $\mu$ M anandamide in presence of 1  $\mu$ M AM630 ( $CB_2$  antagonist) in  $CB_2$ -U2OS cells. **B**, Representative tracings depicting the effect on  $[Ca^{2+}]_i$  of 1  $\mu$ M anandamide applied by bath in absence or presence of 1  $\mu$ M AM630 to  $CB_2$ -expressing U2OS cells.

Extracellular administration of 1  $\mu\text{M}$  anandamide or 1  $\mu\text{M}$  WIN55,212-2 produced small and nonsignificant increases in  $[\text{Ca}^{2+}]_i$  in control untransfected U2OS cells, by  $6 \pm 4.1$  nM and  $7 \pm 3.8$  nM, respectively; in each case,  $n = 6$  cells (Supp. Fig. 2).

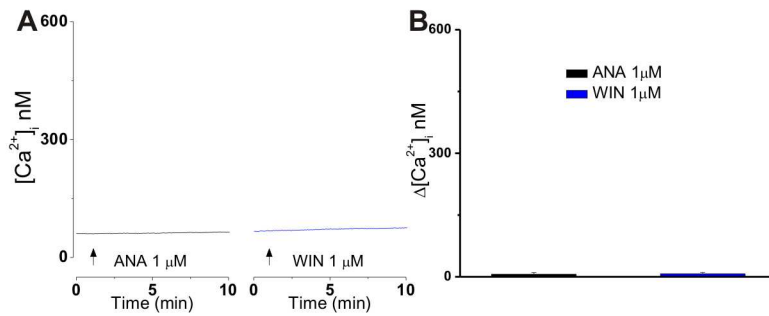

**Supplemental Figure 2. Control untransfected U2OS cells do not respond to extracellular administration of anandamide or WIN55,212-2.** **A**, Characteristic tracings illustrating nonsignificant  $\text{Ca}^{2+}$  responses of untransfected U2OS cells to bath-applied anandamide (ANA, 1  $\mu\text{M}$ , left) or WIN55,212-2 (WIN, 1  $\mu\text{M}$ , right). **B**, Comparison of the effects on  $[\text{Ca}^{2+}]_i$  produced by extracellular application of anandamide or WIN55,212-2.

Intracellular microinjection of 1  $\mu\text{M}$  anandamide or 1  $\mu\text{M}$  WIN55,212-2 produced small and nonsignificant increases in  $[\text{Ca}^{2+}]_i$  in control untransfected U2OS cells, by  $21 \pm 6$  nM ( $n = 6$  cells injected) and  $19 \pm 4$  nM ( $n = 6$ ), respectively (Supp. Fig. 3).

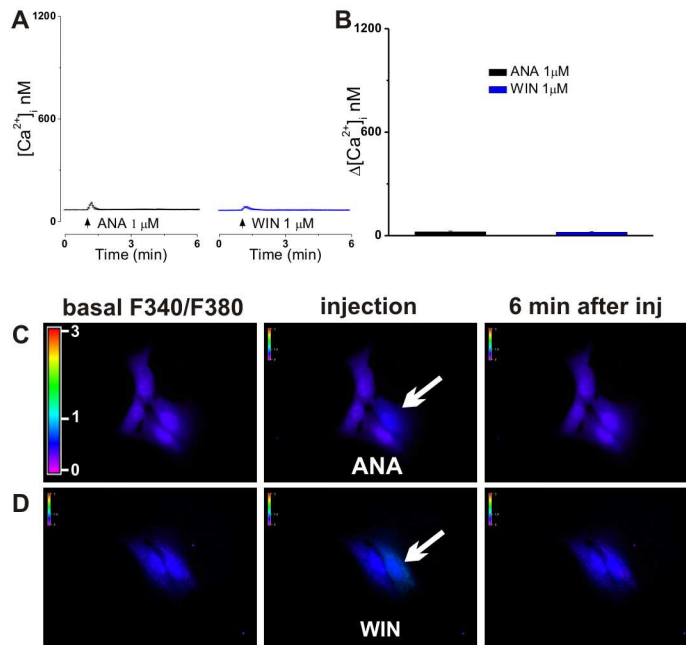

**Supplemental Figure 3. Control untransfected U2OS cells are not responsive to intracellular administration of anandamide or WIN55,212-2.** **A**, Averaged  $\text{Ca}^{2+}$  responses of untransfected U2OS cells to microinjected anandamide (ANA, 1  $\mu\text{M}$ , left) or WIN55,212-2 (WIN, 1  $\mu\text{M}$ , right). **B**, Comparison of the effects on  $[\text{Ca}^{2+}]_i$  produced by intracellular administration of anandamide or WIN55,212-2. **C,D**, Characteristic fluorescence images of Fura-2 AM-loaded  $\text{CB}_2$ -U2OS cells before (left), during (middle) and 6 min after (right) intracellular administration of 1  $\mu\text{M}$  anandamide (**C**) or of 1  $\mu\text{M}$  WIN55,212-2 (**D**); arrows indicate the injected cells; the fluorescence scale (0-3) is illustrated in each panel and magnified in the left panel of **C**.
